# Supplementary material
Source: PubMed Central journal article supplement (PMC5317241)

## SUPPLEMENTARY DATA

**Supplementary Figure 1.** Flowchart and descriptive statistics of the study population.

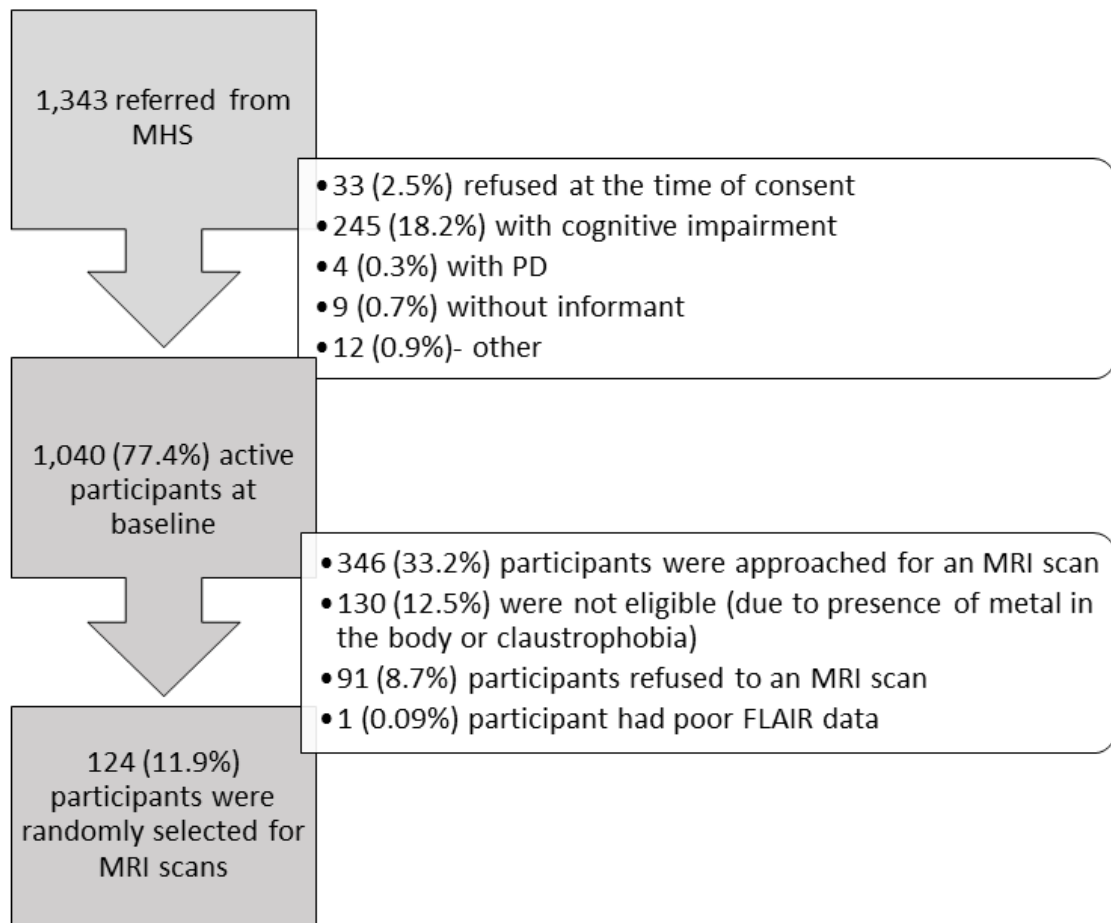

Supplement: DC152331SupplementaryData.pdf [file DC152331SupplementaryData.pdf]
